# Supplementary material
Source: PubMed Central journal article supplement (PMC6213280)

# Source Data for Figure 3

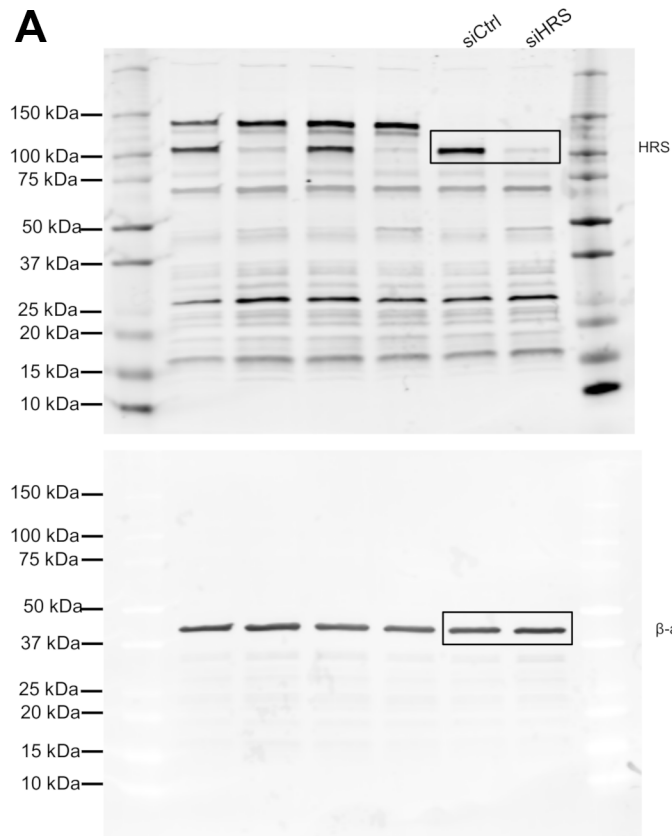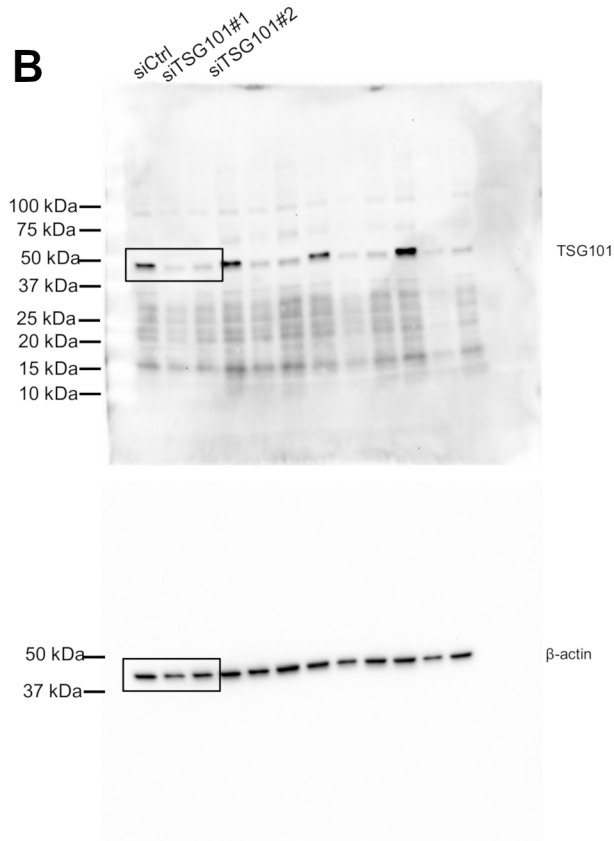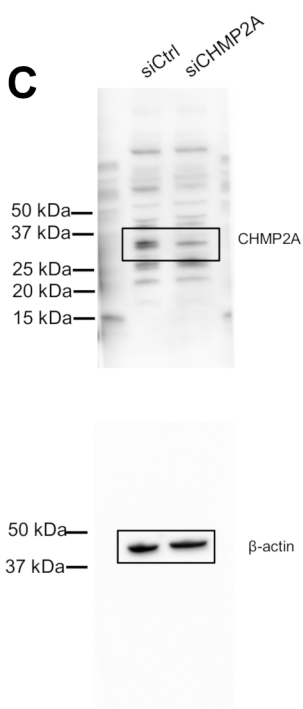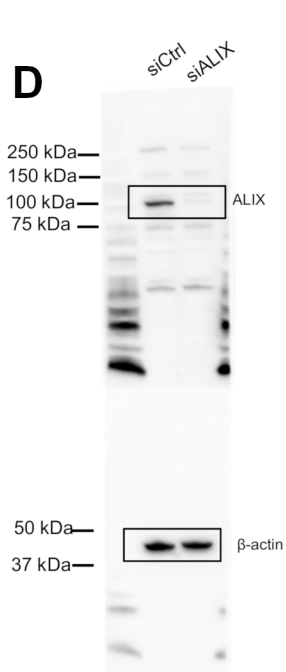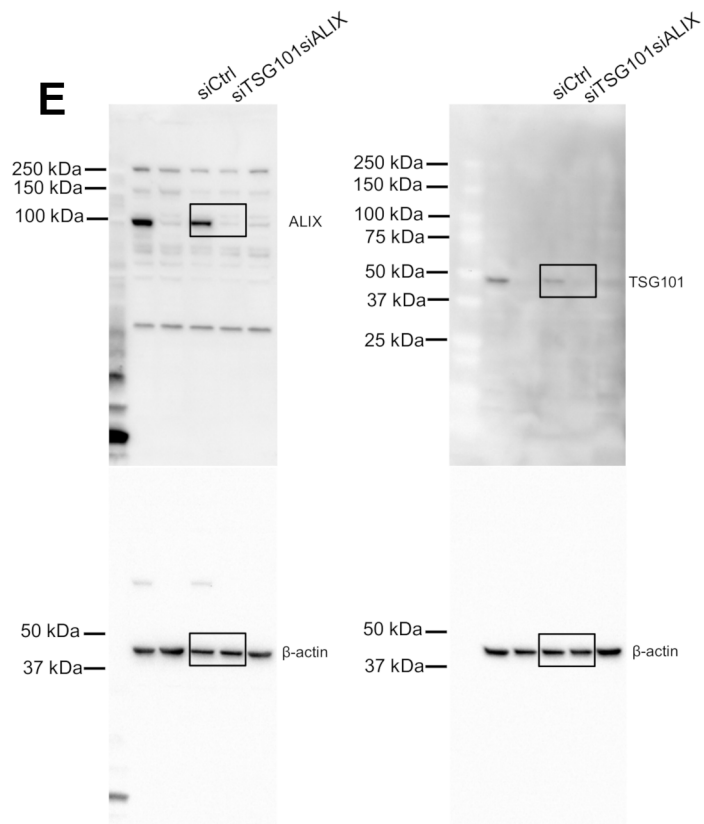

Supplement: EMBJ-37-e99753-s012.pdf [file EMBJ-37-e99753-s012.pdf]
